# Supplementary material for: Validation and Adjustment of the Patient Experience Questionnaire (PEQ): A Regional Hospital Study in Norway
Source: MDPI journal article supplement (doi:10.3390/ijerph18137141), 2021-07-03
Supplement: s1 [file s1]

**Table S1.** Metric invariance across department aggregates.

| Item |      | Dim. | Kir      |          | Med      |          | z-Stat    |
|------|------|------|----------|----------|----------|----------|-----------|
|      |      |      | Estimate | <i>p</i> | Estimate | <i>p</i> |           |
| sp9  | <--- | N6   | 1.23     | 0.00     | 1.26     | 0.00     | 0.42      |
| sp8  | <--- | N5   | 1.13     | 0.00     | 1.15     | 0.00     | 0.43      |
| sp7  | <--- | N4   | 0.92     | 0.00     | 0.99     | 0.00     | 1.77 *    |
| sp6  | <--- | N3   | 0.87     | 0.00     | 0.90     | 0.00     | 0.86      |
| sp5  | <--- | N2   | 0.91     | 0.00     | 0.93     | 0.00     | 0.76      |
| sp4  | <--- | N1   | 0.65     | 0.00     | 0.75     | 0.00     | 3.43 ***  |
| sp16 | <--- | D6   | 1.27     | 0.00     | 1.16     | 0.00     | −2.56 **  |
| sp15 | <--- | D5   | 1.15     | 0.00     | 1.07     | 0.00     | −1.97 **  |
| sp14 | <--- | D4   | 1.25     | 0.00     | 1.12     | 0.00     | −3.06 *** |
| sp13 | <--- | D3   | 0.82     | 0.00     | 0.88     | 0.00     | 1.81 *    |
| sp12 | <--- | D2   | 1.15     | 0.00     | 1.07     | 0.00     | −2.08 **  |
| sp11 | <--- | D1   | 0.90     | 0.00     | 0.85     | 0.00     | −1.57     |
| sp19 | <--- | IF3  | 0.98     | 0.00     | 0.99     | 0.00     | 0.34      |
| sp18 | <--- | IF1  | 0.84     | 0.00     | 0.85     | 0.00     | 0.19      |
| sp24 | <--- | OR3  | 0.93     | 0.00     | 0.95     | 0.00     | 0.50      |
| sp23 | <--- | OR2  | 0.97     | 0.00     | 0.90     | 0.00     | −1.34     |
| sp22 | <--- | OR1  | 0.87     | 0.00     | 0.89     | 0.00     | 0.58      |
| sp26 | <--- | NK1  | 0.95     | 0.00     | 0.84     | 0.00     | −2.56 **  |
| sp32 | <--- | ST5  | 0.85     | 0.00     | 0.83     | 0.00     | −0.31     |
| sp31 | <--- | ST4  | 1.06     | 0.00     | 1.07     | 0.00     | 0.01      |
| sp30 | <--- | ST3  | 0.97     | 0.00     | 1.03     | 0.00     | 0.91      |
| sp29 | <--- | ST2  | 0.91     | 0.00     | 1.00     | 0.00     | 1.73 *    |
| sp28 | <--- | ST1  | 0.89     | 0.00     | 0.98     | 0.00     | 1.67 *    |
| sp44 | <--- | DC1  | 1.00     | 0.00     | 0.97     | 0.00     | −0.69     |
| sp47 | <--- | IT1  | 1.11     | 0.00     | 1.18     | 0.00     | 0.55      |

Note: \* ( $p < 0.05$ ), \*\* ( $p < 0.01$ ), \*\*\* ( $p < 0.001$ )—not metrically invariant; NS: nurse services; DS: doctor services; IFN: information; ORG: organisation; NK: next of kin; ST: standard; DCH: discharge; ITR: interaction.

**Table S2.** Scalar invariance across department aggregates.

| Model                  | DF  | CMIN   | P    |
|------------------------|-----|--------|------|
| Measurement weights    | 23  | 61.20  | 0.00 |
| Measurement intercepts | 23  | 61.20  | 0.00 |
| Structural covariances | 73  | 254.70 | 0.00 |
| Measurement residuals  | 119 | 391.29 | 0.00 |

Note:  $p < 0.05$ - no scalar invariance.
